# Supplementary material
Source: Research Square preprint supplement (doi:10.21203/rs.3.rs-9243762/v1)
Supplement: Supplementary file 1 [file b0c1d332da02f20578326530.pdf]

## SPIRIT 2025 Checklist – GRACE Pilot RCT (Completed)

| Item No. | Description                            | Location in Manuscript       |
|----------|----------------------------------------|------------------------------|
| 1a       | Title identifies design and protocol   | Title page                   |
| 1b       | Structured summary including WHO items | Structured Abstract          |
| 2        | Protocol version and date              | Declarations 4.9             |
| 3a       | Names, affiliations, roles             | Title page                   |
| 3b       | Sponsor name/contact                   | Title page                   |
| 3c       | Role of sponsor/funder                 | Declarations 4.5             |
| 3d       | Trial oversight committees             | Methods 2.1                  |
| 4        | Trial registration + URL               | Title page; Declarations 4.8 |
| 5        | Protocol + SAP availability            | Methods 2.9                  |
| 6        | Data sharing statement                 | Methods 2.9                  |
| 7a       | Funding sources                        | Declarations 4.5             |
| 7b       | Conflicts of interest                  | Declarations 4.4             |
| 8        | Dissemination policy                   | Methods 2.10                 |
| 9a       | Background and rationale               | Introduction                 |
| 9b       | Explanation of comparator              | Methods 2.6                  |
| 10       | Objectives                             | Abstract + Introduction      |
| 11       | Patient and public involvement         | Methods 2.1                  |
| 12       | Trial design                           | Methods 2.1                  |
| 13       | Setting                                | Methods 2.2                  |
| 14       | Eligibility criteria                   | Methods 2.3                  |
| 15       | Interventions                          | Methods 2.6                  |
| 16a      | Outcomes and timing                    | Figure 2; Methods 2.7-2.8    |
| 16b      | Pilot progression criteria             | Methods 2.9; Table 3         |
| 17a      | Sequence generation                    | Methods 2.5                  |
| 17b      | Allocation concealment                 | Methods 2.5                  |
| 17c      | Implementation                         | Methods 2.5                  |
| 18a      | Blinding                               | Methods 2.1                  |
| 18b      | If unblinded, rationale                | Methods 2.1                  |
| 19       | Data collection methods                | Methods 2.7-2.8              |
| 20       | Data management                        | Methods 2.7                  |
| 21       | Statistical methods                    | Methods 2.9                  |

|     |                               |                                 |
|-----|-------------------------------|---------------------------------|
| 22  | Interim analyses              | Not applicable (pilot)          |
| 23a | Data Monitoring Committee     | Added statement (no DMC needed) |
| 23b | Harms                         | Methods 2.11                    |
| 23c | Auditing                      | Not applicable                  |
| 24  | Ethics approval               | Declarations 4.1                |
| 25  | Protocol amendments           | Added statement                 |
| 26a | Consent                       | Methods 2.5 + 2.11              |
| 26b | Consent for ancillary studies | Not applicable                  |
| 27  | Confidentiality               | Methods 2.7                     |
| 28  | Conflicts of interest         | Declarations 4.4                |
| 29  | Access to data                | Methods 2.9                     |
| 30  | Post-trial care               | Standard care; not applicable   |
| 31  | Dissemination                 | Methods 2.10                    |
| 32  | Protocol versioning           | Declarations 4.9                |
| 33  | Supplementary materials       | Supplement tables + Figure 2    |
| 34  | Biological specimens          | Not applicable                  |
