# Supplementary material
Source: Research Square preprint supplement (doi:10.21203/rs.3.rs-9243762/v1)
Supplement: Supplementary file 2 [file fe672414231b7762bb222d41.docx]

# Supplementary material

**Figure 1**

*Core components of GRACE*

| *Component* | Description |
| --- | --- |
| *Systematic identification* | Using aforementioned criteria*.* All patients who are screened for potential inclusion will be logged. |
| *Systematic and holistic needs assessment* | A structured and comprehensive needs assessment will be conducted every 3 months, using the ICECAP-Supportive Care Measure (ICECAP-SCM) as by Coast et al 2016 (23) as a guiding tool. This tool serves to support holistic reflection on key areas of quality of life. The assessment will be followed by a person-centered conversation to explore the participants’ values, preferences, and priorities. Community nurses will facilitate this dialogue with patients using a shared decision-making tool, ensuring a plan is developed based on the assessment. The decision-making tool has been inspired by Glyn Elwyn’s (2020) model of goal-based shared decision-making (43). It facilitates a goal-oriented conversation in which the subject begins by identifying their 2–3 most pressing concerns from their ICECAP responses. Together with the community nurse, they discuss how these issues may be connected, define achievable goals, and agree on relevant actions from the available options. Additional follow-ups can be planned to evaluate progress. The community nurses have been given a single-page guide summarizing the needs assessment, as well as a more comprehensive guide that includes possible areas of interest, relevant probes, and other considerations for each ICECAP-SCM topic. |
| *Ongoing needs assessment* | The needs assessment, as described above, will be conducted at the start of the intervention and at a minimum every 3 months for the 12 month duration. |
| *Personalized treatment* | The measures and care plan employed for each patient during the GRACE intervention will depend on the needs assessment, the decision-making process, and will be based on the nurses’ clinical judgment and the resources available in their municipality. The nurses have measures available to address both psychological, social, spiritual, and physical needs. This entails referral to a therapist for support, visits by a priest, and assistance from social workers, among others. The research team will examine the care plans of selected patients as part of the evaluation; however, the full extent of the personalized treatment plans will not be mapped, as the goal is to provide personalized treatment based on clinical judgment and within available resources. |
| *Advance Care Planning (ACP)* | Subjects will be systematically approached to discuss advance care planning at the end of each needs assessment as part of the ICECAP-SCM questionnaire. The content will be adjusted to the subject’s level of readiness, and the subjects can choose to decline the invitation. The community nurses have received tools to facilitate this. |
| *Virtual cross-sectoral conference* | The virtual conference will be held every other week. At the conference, a representative from the Respiratory Specialized Palliative Care team and the community nurses from the patient’s municipality will be present. The conference format is presented in Table 2 and has been inspired by Wentzer and Høgsgaard 2022 (44). There is an estimated 10 minutes per patient; however, fluctuations are expected, particularly at the beginning of the intervention. |
| *Training session*. | To maintain intervention fidelity and build confidence in the workflow, participating nurses completed training on the principles of early palliative care for patients with severe COPD and the associated intervention and tools. Furthermore, the session addressed communication skills and strategies for supporting patients in situations where no straightforward solution exists. This aspect emerged from the co-production process, which highlighted nurses’ particular concern about how to navigate ‘unsolvable’ needs. |

**Table 1**

*Comorbidities*

| Comorbidities | ICD-10 diagnosis code |
| --- | --- |
| Ischemic heart disease | I20-I25.9 |
| Stroke | G45-G46.8, I60-I63.9, I65-I66.9, I67.0-I67.3, I67.5-I67.6, I68.1-I68.2, I69.0-I69.3 |
| Diabetes | E10-E10.1, E10.3-E11.1, E11.3-E11.9, P70.2 |
| Cirrhosis | B18-B18.9, I85-I85.9, I98.2, K70-K70.3, K71.7, K73-K75, K75.2, K75.4-K76.2, K76.4-K76.9, K77.8 |
| Chronic Kidney Disease | D63.1, E10.2, E11.2, I12-I13.9, N02-N08.8, N15.0, N18-N18.9, Q61-Q62.8 |
| Depressive Disorders | F32-F33.9, F34.1 |
| Osteoarthritis | M16-M18.9 |
| Hypertensive heart disease | I11-I11.9 |
| Headache disorders | G43-G44.89 |
| Asthma | J45-J46.9 |
